# Supplementary material for: Leukocyte telomere length correlates with hypertrophic cardiomyopathy severity
Source: PubMed Central journal article supplement (PMC6060137; doi:10.1038/s41598-018-29072-8), 2018-07-25
Supplement: 41598_2018_29072_MOESM1_ESM.pdf [file 41598_2018_29072_MOESM1_ESM.pdf]

# **Leukocyte telomere length correlates with hypertrophic cardiomyopathy severity**

Shambhabi Chatterjee<sup>†</sup>, David de Gonzalo-Calvo<sup>†</sup>, Anselm A. Derda, Katharina Schimmel, Kristina  
Sonnenschein, Udo Bavendiek, Johann Bauersachs, Christian Bär\* and Thomas Thum\*

## **SUPPLEMENTAL INFORMATION**

\*Corresponding Authors

<sup>†</sup> equal contribution

**Supplemental Table 1. Leukocyte telomere levels in study groups (adjusted by age)**

---

| <b>Variable</b>     | <b>Healthy</b> | <b>HNCM</b> | <b>HOCM</b>                |
|---------------------|----------------|-------------|----------------------------|
| <b>logT/S ratio</b> | 2.57 ± 0.02    | 2.48 ± 0.03 | 2.47 ± 0.2 <sup>b cc</sup> |

---

Data are presented as estimated marginal mean ± SEM.

Healthy vs. HNCM: b < 0.050. Healthy vs. HOCM: cc < 0.010.

**Supplemental Table 2. Strictly age- and sex- matched healthy controls and HCM patients.**

| <b>Variable</b> | <b>Healthy</b> | <b>HCM</b>  | <b>P-value</b> |
|-----------------|----------------|-------------|----------------|
| N               | 30             | 30          |                |
| Age (years)     | 42.5 ± 14.0    | 41.6 ± 14.0 | 0.913          |
| Male N (%)      | 16 (53)        | 16 (53)     |                |
| logT/S ratio    | 2.57 ± 0.11    | 2.49 ± 0.17 | 0.040          |

Data are presented as mean ± SD for continuous variables and as frequencies (percentages) for categorical variables.

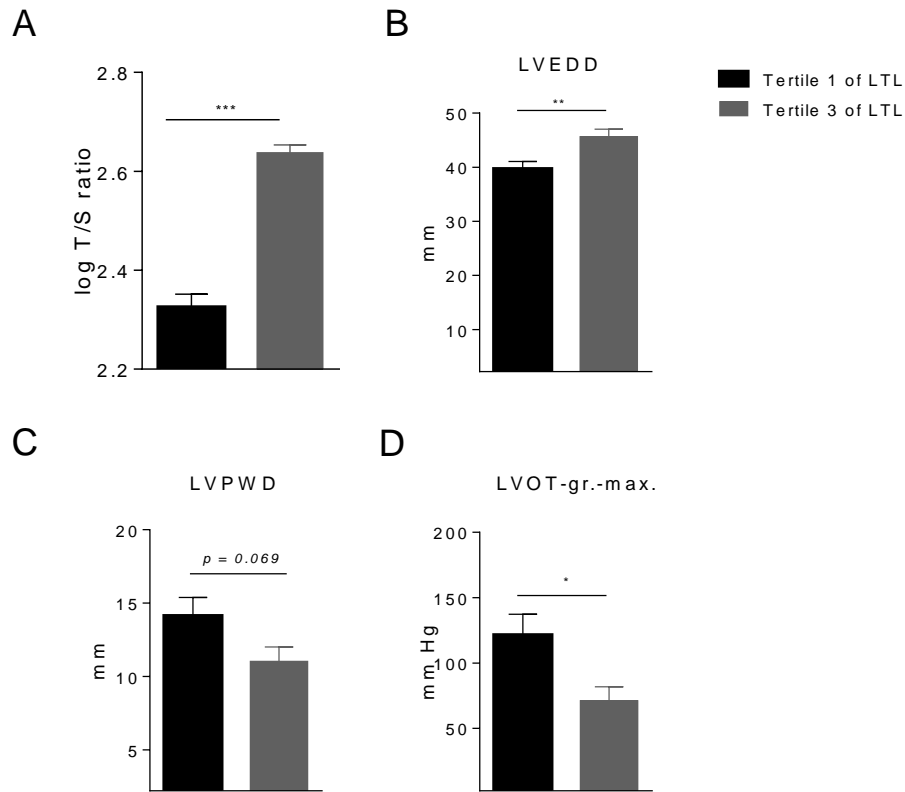

**Supplemental Figure 1| LTL is negatively associated with HOCM severity.** HOCM patients were stratified by tertiles of telomere length (A). Patients in the first tertile demonstrated significantly higher LVOT grad. max (D) and LVPWD (C) values, while LVEDD (B) was significantly lower in comparison to patients in tertile 3. The results are shown as mean  $\pm$  SD. Between-group differences were analyzed using Student's t-test for independent samples. \*:  $P < 0.05$ , \*\*\*:  $P < 0.001$ .
